# Supplementary material for: A comprehensive design framework for all-dielectric metasurfaces by harnessing the interplay of controlled multiple multipole excitation, Rayleigh anomaly, Mie and lattice resonances
Source: Royal Society of Chemistry journal article supplement (doi:10.1039/d6na00100a), 2026-04-29
Supplement: d6na00100a1.pdf [file d6na00100a1.pdf]

## Supplemental Information

**Title: A comprehensive design framework for all-dielectric metasurfaces by harnessing the interplay of controlled multiple multipoles excitation, Rayleigh anomaly, Mie and lattice resonances**

Tummaluru Khadar Basha,<sup>1</sup> Faraz A. Inam,<sup>2</sup> and Junaid Masud Laskar<sup>1\*</sup>,

*Nanophotonics and Quantum Meta-Optics Group, Center for Nanophotonics, Department of Physics and Nanotechnology, Kattankulathur, Chennai, Tamil Nadu, PIN- 603203, India*

*Department of Physics, Aligarh Muslim University, Aligarh, Uttar Pradesh, PIN-202002, India*

(\*Electronic mail: [junaidmb@srmist.edu.in](mailto:junaidmb@srmist.edu.in))

### Theoretical background

#### Electromagnetic wave scattering cross-section ( $C_{sca}^{total}$ ) of a meta-atom

Multipole moments of different nature and orders, electric dipole ( $p_\alpha$ ), magnetic dipole ( $m_\alpha$ ), electric quadrupole ( $Q_{\alpha\beta}^e$ ) and magnetic quadrupole ( $Q_{\alpha\beta}^m$ ), can be excited in a meta-atom on excitation by an electromagnetic wave, as shown in Fig. 1<sup>1</sup>. The resonant excitation of multipoles take place on satisfying the following conditions. First, meta-atom physical dimensions should be of the order of excitation wavelength ( $\lambda_{excitation}$ ). Secondly, the meta-atom refractive index should have high real values, while having lower value for the imaginary component. On excitation of a dielectric meta-atom ( $\text{TiO}_2$ ,  $n_{\text{TiO}_2} = 2.49 @ \lambda_{excitation} = 488 \text{ nm}$ ) by an electromagnetic wave ( $\lambda_{excitation} = 488 \text{ nm}$ ) [Fig. 1], the total electromagnetic wave scattering cross-section ( $C_{sca}^{total}$ ) can be expressed using multipolar decomposition, considering the contributions from different individual multipole moments- electric dipole ( $p_\alpha$ ), magnetic dipole ( $m_\alpha$ ), electric quadrupole ( $Q_{\alpha\beta}^e$ ) and magnetic quadrupole ( $Q_{\alpha\beta}^m$ ), as given below

$$C_{sca}^{total} = C_{sca}^p + C_{sca}^m + C_{sca}^{Q^e} + C_{sca}^{Q^m} \quad (1)$$

$$C_{sca}^{total} = \frac{k^4}{6\pi\epsilon_0^2|E_{Inc}|^2} \left[ \sum_{\alpha} (|p_{\alpha}|^2) + \sum_{\alpha} (|m_{\alpha}|^2) + \frac{1}{120} \left[ \sum_{\alpha\beta} (|kQ_{\alpha\beta}^e|^2) + \sum_{\alpha\beta} \left( \left| \frac{kQ_{\alpha\beta}^m}{c} \right|^2 \right) \right] \right] \quad (2)$$

Here,  $C_{sca}^p$ ,  $C_{sca}^m$ ,  $C_{sca}^{Q^e}$ , and  $C_{sca}^{Q^m}$  are the cross sections corresponding to electric dipole (ED), magnetic dipole (MD), electric quadrupole (EQ), and magnetic quadrupole (MQ), as shown in Fig. 1c. The notations  $|E_{inc}|^2$ ,  $k$  and  $c$  are the amplitude of the incident electric field, wave vector, and speed of light, respectively. The electromagnetic multipole moments are deduced from the distribution of induced electric current density ( $J_\omega$ ) of a meta-atom, on considering the surrounding

medium as air [ $n_{air} = \sqrt{\epsilon_0} = 1$ ]. The induced current density ( $J_\omega$ ) in the meta-atom is expressed as

$$J_\omega(r) = -i\omega\epsilon_0[\epsilon_r(r) - 1]E(r) \quad (3)$$

Here,  $\epsilon_0$  and  $\epsilon_r(r)$  are the permittivity in vacuum and relative permittivity at the position coordinates  $r$  with respect to the surrounding medium air, respectively. The electric field  $E(r)$  contains both the incident field and the scattered radiation by the meta-atom. The electromagnetic multipole moments can be expressed as an integral function of induced current density ( $J_\omega$ ), as given below.

Electric dipole moment-**ED**:

$$p^\alpha = -\frac{1}{i\omega} \left\{ \int d^3r J_\alpha^\omega j_0(kr) + \frac{k^2}{2} \int d^3r [3(r \cdot J_\omega)r_\alpha - r^2 J_\alpha^\omega] \frac{j_2(kr)}{(kr)^2} \right\} \quad (4)$$

Magnetic dipole moment-**MD**:

$$m^\alpha = \frac{3}{2} \left\{ \int d^3r (r \times J_\omega)_\alpha \frac{j_1(kr)}{kr} \right\} \quad (5)$$

Electric quadrupole moment-**EQ**:

$$Q_{\alpha\beta}^e = -\frac{3}{i\omega} \left\{ \int d^3r [3(r_\beta J_\alpha^\omega + r_\alpha J_\beta^\omega) - 2(r \cdot J_\omega)\delta_{\alpha\beta}] \frac{j_1(kr)}{kr} + 2k^2 \int d^3r [5r_\alpha r_\beta (r \cdot J_\omega) - (r \cdot J_\omega)r_\alpha r_\beta] \frac{j_2(kr)}{(kr)^2} \right\} \quad (6)$$

Magnetic quadrupole moment-**MQ**:

$$Q_{\alpha\beta}^m = 15 \int d^3r \{ r_\alpha (r \times J_\omega)_\beta + r_\beta (r \times J_\omega)_\alpha \} \frac{j_2(kr)}{(kr)^2} \quad (7)$$

Here,  $\alpha, \beta$  are the symbolic representations of  $x, y, z$  position co-ordinates.

### Effective refractive index ( $n_{eff}$ ) of a metasurface on an opaque substrate

The effective refractive index ( $n_{eff}$ ) of a metasurface on an opaque substrate, as a function of the diameter ( $D_{MA}$ ) of each meta-atom as well as the metasurface array lattice periodicity ( $P_{MS}$ ), is given by the following expression<sup>2</sup>

$$n_{eff} = n_{TiO_2} \left( \frac{\pi \cdot D_{MA}^2}{3 \cdot \sqrt{3} \cdot P_{MS}^2} \right) + n_{air} \left( 1 - \frac{\pi \cdot D_{MA}^2}{3 \cdot \sqrt{3} \cdot P_{MS}^2} \right) \quad (8)$$

Here,  $n_{TiO_2}$  and  $n_{air}$  are the refractive indices of the  $TiO_2$  meta-atom and surrounding medium air, respectively.

## Results

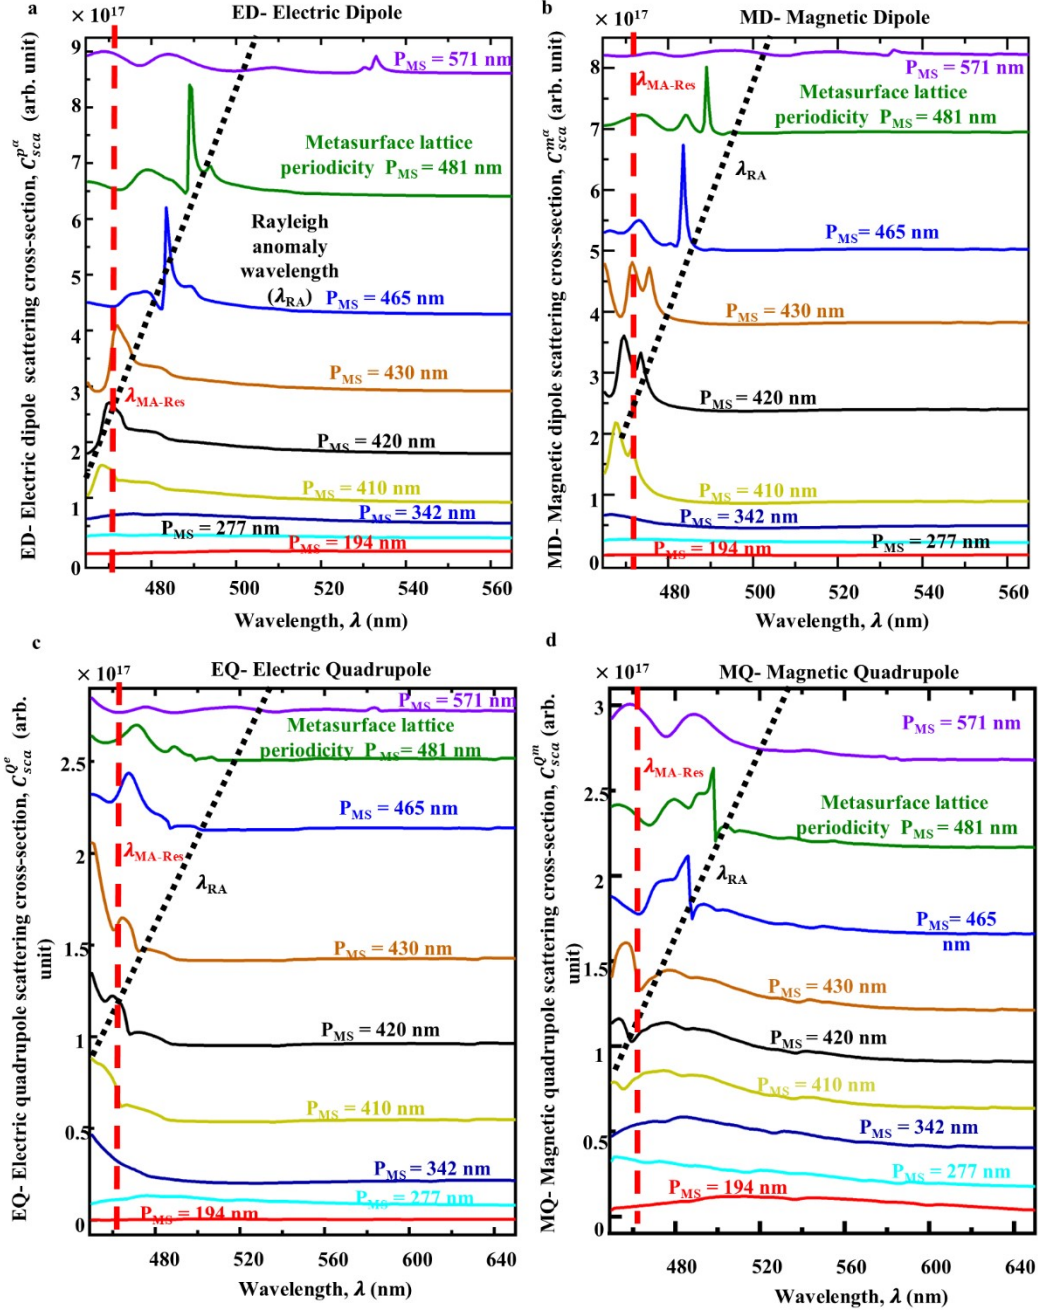

Lattice periodicity ( $P_{MS}$ ) dictates coupling among Mie-resonance and lattice resonances

Figure S1: Multipole scattering cross-section ( $C_{sca}$ ) EM spectra of metasurface for different lattice periodicities ( $P_{MS}$ )

## Number of meta-atoms in finite metasurface dictates spatial hybridization of EM multipoles

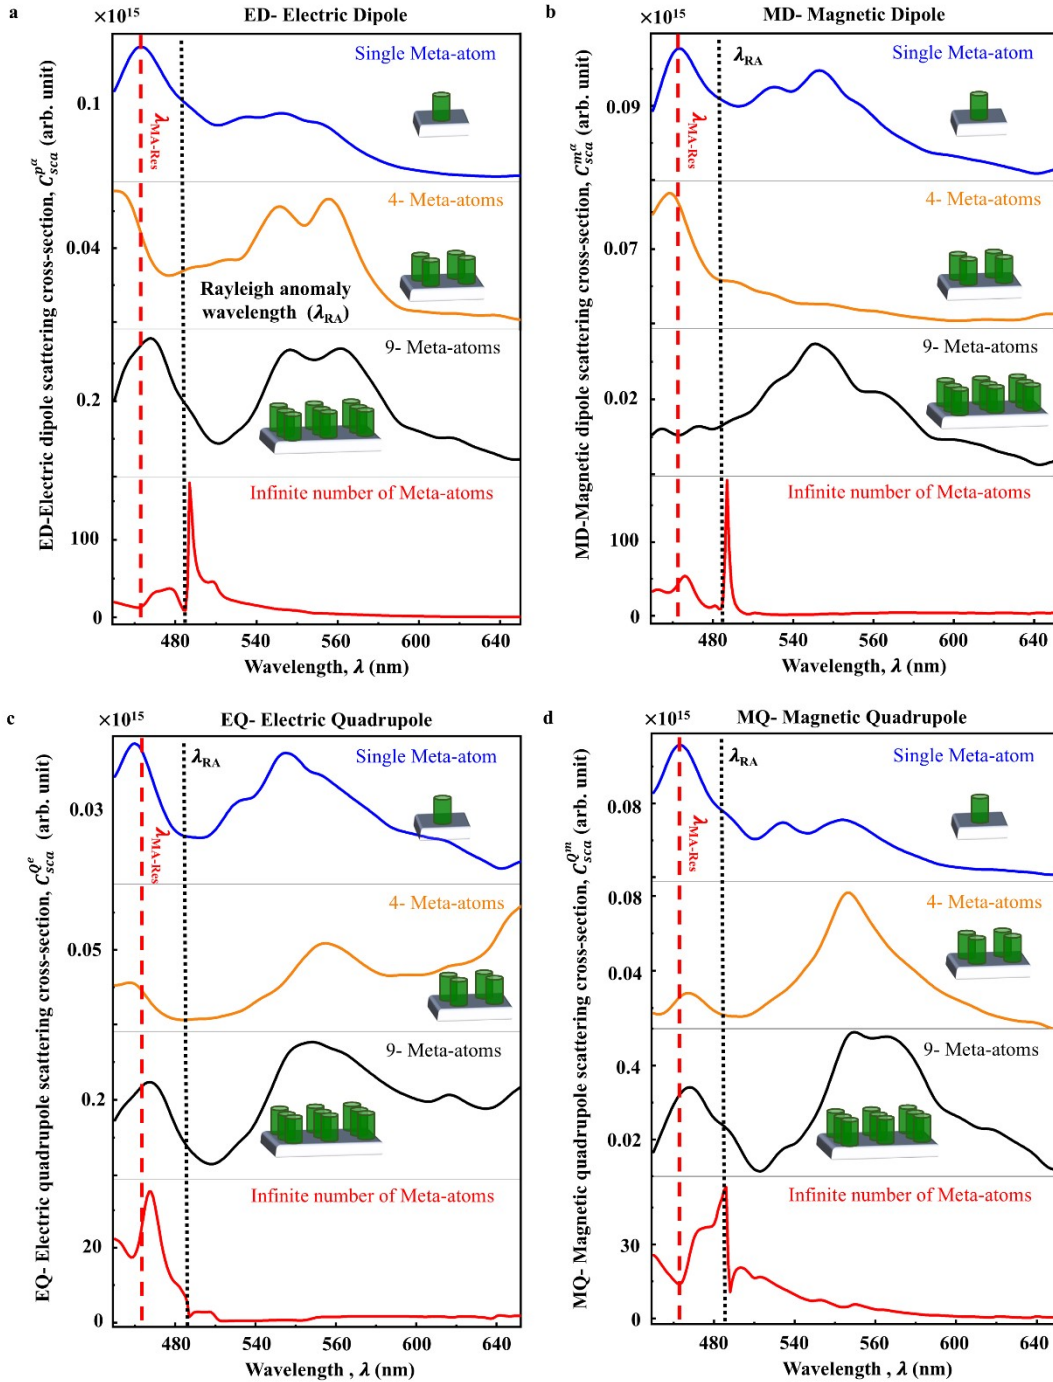

**Figure. S2:** Multipole scattering cross-section ( $C_{sca}$ ) EM spectra of metasurface for different number of meta-atoms.

## References

- 1 R. Alae, C. Rockstuhl and I. Fernandez-Corbaton, *Optics Communications*, 2018, **407**, 17–21.
- 2 D. Visser, D. Y. Chen, Y. Désières, A. P. Ravishankar and S. Anand, *Scientific Reports*, 2020, **10**, 1-11.
